# Supplementary material for: Developmental alterations in the biophysical properties of Cav1.3 Ca2+ channels in mouse inner hair cells
Source: PubMed Central journal article supplement — Channels (Austin). 2013 Mar 19;7(3):171–81. doi: 10.4161/chan.24104 (PMC3710344; doi:10.4161/chan.24104), 2013-03-19

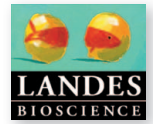

## **Supplemental Material to:**

**Akira Inagaki and Amy Lee**

**Developmental alterations in the biophysical properties of  
Cav1.3 Ca<sup>2+</sup> channels in mouse inner hair cells**

**May/June 2013; Vol 7 (Issue 3)**

**<http://dx.doi.org/10.4161/chan.24104>**

**<http://www.landesbioscience.com/journals/channels/article/24104/>**

**Supplementary Figure 1: Voltage-dependent activation of  $I_{Ca}$  is not affected by BAPTA in mature IHCs than in immature IHCs**

*A*, Representative traces for  $I_{Ca}$ . Currents were evoked by 15–ms depolarizing pulses from a holding voltage of  $-84$  mV. *B*,  $I$ - $V$  relationships for currents in *A*. *C*, Conductance-voltage relationships for currents in *B*. Tail current amplitudes were normalized to that obtained with a pulse to  $+50$  mV (Norm. tail) and plotted against test voltage. Smooth line represents curve fit from the Boltzmann equation. The parameters for the fits shown were in *C*,  $V_h = -24.1$ ,  $k = 9.54$  for P6-8 ( $n = 22$ ),  $V_h = -19.0$ ,  $k = 13.1$  for P16-18 ( $n = 8$ ).

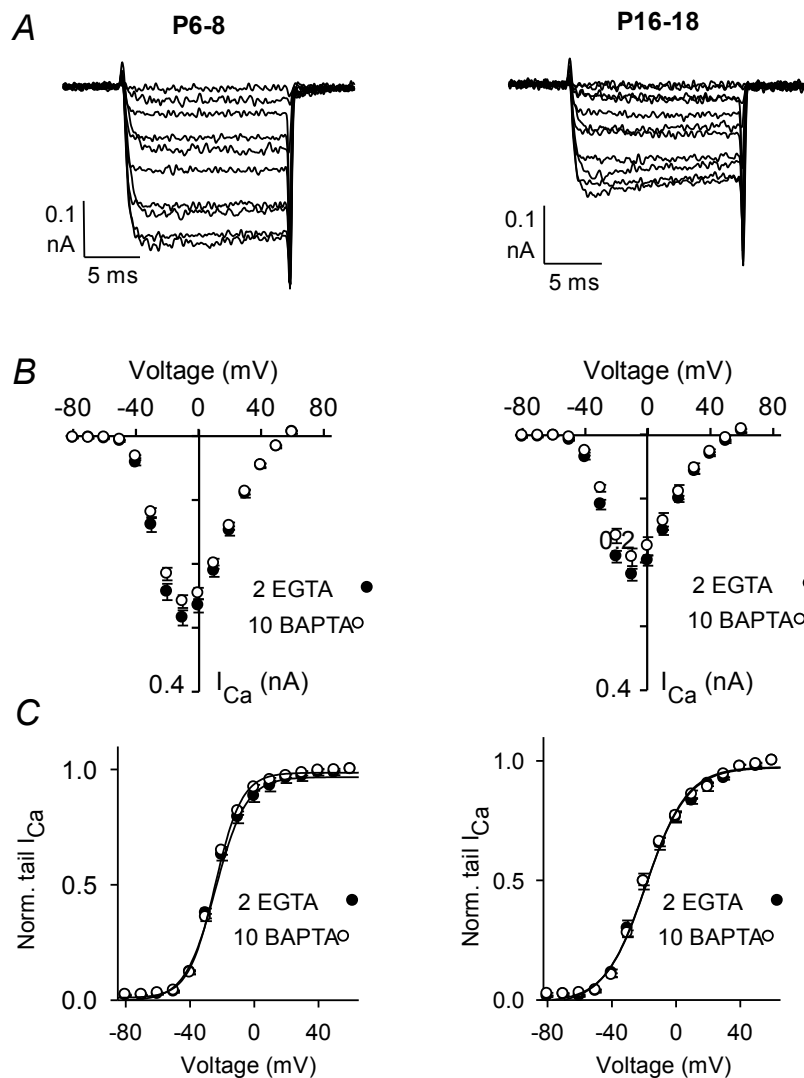

Supplement: chan-7-171-s01.pdf [file chan-7-171-s01.pdf]
